# Supplementary material for: The Serine Protease EspC from Enteropathogenic Escherichia coli Regulates Pore Formation and Cytotoxicity Mediated by the Type III Secretion System
Source: PubMed Central journal article supplement (PMC4488501; doi:10.1371/journal.ppat.1005013), 2015-07-01
Supplement: ppat.1005013.s010.pdf [file ppat.1005013.s010.pdf]

| <b>Strains</b>              | <b>Characteristics</b>                                                                      | <b>Reference</b> |
|-----------------------------|---------------------------------------------------------------------------------------------|------------------|
| WT E2348/69                 | EPEC wild-type strain                                                                       | [3]              |
| WT 85-170                   | EHEC wild-type strain                                                                       | [4]              |
| $\Delta espC$               | <i>espC</i> isogenic mutant of WT E2348/69 ( <i>espC::kan</i> )                             | This study       |
| $\Delta espP$               | <i>espP</i> isogenic mutant of WT 85-170 ( <i>espP::kan</i> )                               | This study       |
| $\Delta espC / pEspC^+$     | $\Delta espC$ strain complemented with pJLM174 grown in inducing conditions (arabinose)     | This study       |
| $\Delta espC / pEspC^-$     | $\Delta espC$ strain complemented with pJLM174 grown in repressing conditions (glucose)     | This study       |
| $\Delta escN$               | <i>escN</i> isogenic mutant of WT E2348/69 ( <i>escN::kan</i> )                             | [5]              |
| $\Delta bfpA$               | <i>bfpA</i> isogenic mutant of WT E2348/69 ( <i>bfpA::kan</i> )                             | This study       |
| $\Delta espC / \Delta bfpA$ | <i>espC</i> and <i>bfpA</i> isogenic mutant of WT E2348/69 ( <i>espC::kan ; bfpA::cat</i> ) | This study       |
| MAS111                      | <i>espC</i> mutant of WT E2348/69                                                           | [13]             |
| <b>Plasmids</b>             |                                                                                             |                  |
| pJLM174                     | <i>espC</i> cloned into pBAD30                                                              | [6]              |
| pJLM174-S256I               | <i>espC</i> -S256I cloned into pBAD30                                                       | This study       |
| pSat                        | <i>sat</i> cloned into pACYC184                                                             | [7]              |
| pSepA                       | <i>sepA</i> cloned into pUC18                                                               | [8]              |
| pEspP                       | <i>espP</i> cloned into Topo-blunt® vector                                                  | This study       |
